# Supplementary material for: Bio-organic synthesis of a newly isolated peptide metastin, metastasis suppressor gene KiSS-1 processing product†
Source: Royal Society of Chemistry journal article supplement (doi:10.1039/b104948h), 2001-01-01
Supplement: b104948h.pdf [file b104948h.pdf]

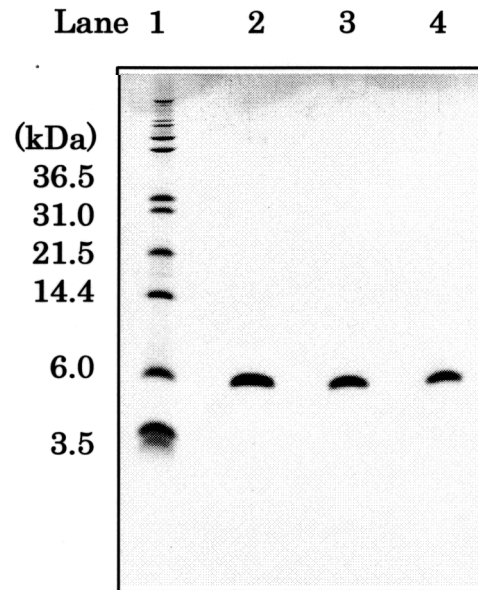

**SDS-PAGE of metastin.**

Lane 1, marker proteins. Lane 2, chemically synthesized metastin (amide form). Lane 3, metastin (amide form) and Lane 4, metastin (acid form) obtained from the fusion protein after cyanylation reaction. SDS-PAGE was performed according to Laemmli (*Nature*, 1970, 227, 680) using Peptide-Page mini (TEFCO) under reducing conditions. After electrophoresis, the proteins were stained with Coomassie Brilliant Blue R-250.

010528\_KISS2#37-40 RT: 0.59-0.64 AV: 4 Avg MW: 5857.7 +- 0.9 NL: 2.78E6  
F: + p ms [ 400.00-1300.00]

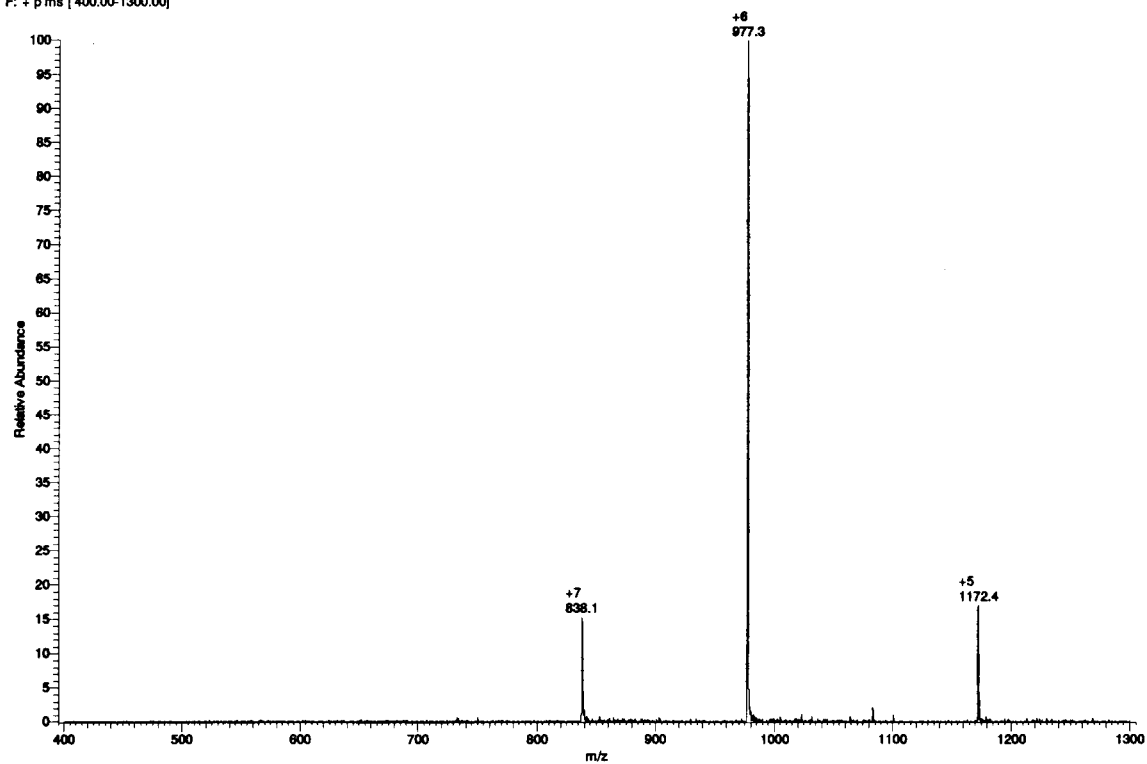

The mass of metastin was determined by electrospray mass spectrometry using a ThermoFinnigan LCQ ion trap mass spectrometer (ThermoQuest, U.S.A.). Sample was dissolved in 1% formic acid-50% acetonitrile.
